# Supplementary material
Source: Research Square preprint supplement (doi:10.21203/rs.3.rs-8697658/v1)
Supplement: Supplementary file 1 [file 70d320a29c2ac84d5b0c394b.docx]

**Searching strategies**

**Google Scholar:** ((((((("systematic review" OR "meta-analysis") AND ("early initiation of breastfeeding" OR "early breastfeeding initiation" OR "breastfeeding initiation within one hour") AND (determinants OR "associated factors" OR "risk factors") AND ("Sub-Saharan Africa"))))))))

**PubMed:**((((((((((((((((((((" Systematic Review"[Publication Type] OR "Meta-Analysis"[Publication Type]) AND ("Breast Feeding"[MeSH] OR "early initiation of breastfeeding" OR "early breastfeeding initiation" OR "breastfeeding initiation within one hour") AND (determinants OR predictors OR "associated factors" OR "risk factors") AND ("Africa South of the Sahara"[MeSH] OR "Sub-Saharan Africa"))))))))))))))))))))) Filtered in the last 15 years, Abstract, Free full article, Meta-analysis, Systematic Review

**Science Direct:** ("systematic review" OR "meta-analysis") AND ("early initiation of breastfeeding" OR "early breastfeeding initiation") AND (determinants OR "associated factors" OR "risk factors") AND ("Sub-Saharan Africa")

**Hinari:** ((((((((((((((((("systematic review" OR "meta-analysis") AND ("early initiation of breastfeeding" OR "early breastfeeding initiation" OR "breastfeeding within one hour") AND (determinants OR predictors OR "associated factors" OR "risk factors") AND ("Sub-Saharan Africa"))))))))))))))))
