# Supplementary material
Source: Research Square preprint supplement (doi:10.21203/rs.3.rs-8697658/v1)
Supplement: Supplementary file 2 [file 8dbd01fd43793ae36b67ba49.xlsx]

## Sheet: EIBF Prevalance
Authors	Study_year	Study_area	Region	Sampling method	Sample_size	EIBF (%)	Stan_error	log_prevalence	Stan_Log_prevalence
Ali F et al.,2020	2020	Tanzania	East Africa	Retrospective	1644	70	1.13021	4.2485	2.41069
Armdie AZ et al.,2024	2024	Ethiopia	East Africa	Prospective	2564	77.8	0.820743	4.35414	2.31363
Ayalew DD et al.,2019	2019	Ethiopia	East Africa	Retrospective	569	77.7	1.74505	4.35286	2.3148
Ayalew G et al.,2024	2024	Ethiopia	East Africa	Systematic	467	73.7	2.03729	4.3	2.36296
Beyene MG et al.,2017	2017	Ethiopia	East Africa	Retrospective	634	83.7	1.46694	4.42724	2.24839
Boakye-Yiadom APet al.,2021	2021	Ghana	West Africa	Systematic	382	39.4	2.50007	3.67377	2.99695
Boksh Z et al.,2018	2018	Burkina Faso	West Africa	Retrospective	157	41	3.92526	3.71357	2.95316
Cyprien KK et al.,2025	2025	Ethiopia	East Africa	Systematic	320	61	2.72661	4.11087	2.54207
Exavery A et al.,2015	2015	Tanzania	East Africa	Retrospective	889	51	1.67661	3.93183	2.72146
Gebremeskel SG et al.,2019	2019	Ethiopia	East Africa	Retrospective	803	61.9	1.71376	4.12552	2.52782
Gebretsadik GG et al.,2020	2020	Ethiopia	East Africa	Retrospective	248	63.6	3.0553	4.15261	2.50163
Getnet B et al.,2020	2020	Ethiopia	East Africa	Systematic	349	51.9	2.67451	3.94932	2.70351
Hermann ND et al.,2020	2020	Cameroon	West Africa	Systematic	250	38.8	3.08192	3.65842	3.01396
Horii N et al.,2017	2017	Nigeria	West Africa	Retrospective	1026	89	0.976827	4.48864	2.19477
Kiwango F et al.,2020	2020	Tanzania	East Africa	Retrospective	866	71.1	1.54037	4.26409	2.39616
Liben ML et al.,2015	2015	Ethiopia	East Africa	Retrospective	623	71.7	1.80472	4.27249	2.38836
Liben ML et al.,2016	2016	Ethiopia	East Africa	Retrospective	403	39.6	2.4362	3.67883	2.99136
Lyellu HY et al., 2020	2020	Tanzania	East Africa	Prospective	413	83.1	1.84403	4.42004	2.25474
Mugadza G et al.,2017	2017	Zimbabwe	Southern Africa	Prospective	200	44	3.50999	3.78419	2.87663
Mukashyaka J et al .,2019	2019	Rwanda	East Africa	Systematic	187	20.4	2.9468	3.01553	3.78633
Mukashyaka J et al.,2020	2020	Rwanda	East Africa	Systematic	187	20.5	2.95216	3.02042	3.78005
MULINDWA YJ et al.,2025	2025	Uganda	East Africa	Systematic	404	41.2	2.44876	3.71844	2.94784
Muchiri IM et al., 2020	2020	Kenya	East Africa	Systematic	108	58.3	4.7445	4.0656	2.58652
Nkoka O et al.,2019	2019	Malawi	Southern Africa	Retrospective	6351	76.9	0.528869	4.34251	2.32416
Meikena HK et al., 2023	2023	Ethiopia	East Africa	Retrospective	385	58.2	2.51373	4.06389	2.58821
Setegn T et al.,2011	2011	Ethiopia	East Africa	Retrospective	608	52.4	2.02543	3.95891	2.69371
Shirima LJ et al .,2022	2022	Tanzania	East Africa	Retrospective	669	62.2	1.87468	4.13035	2.52313
Tilahun G et al.,2016	2016	Ethiopia	East Africa	Retrospective	409	62.9	2.38864	4.14155	2.5123
Tongun JB et al .,2019	2019	Sudan	East Africa	Prospective	806	48.1	1.7599	3.87328	2.7822
Wolde T et al.,2014	2014	Ethiopia	East Africa	Retrospective	174	88.5	2.4185	4.483	2.19965
Zewdu F et al.,2025	2025	Ethiopia	East Africa	Systematic	885	74.7	1.46133	4.31348	2.3506

## Sheet: EIBF Factor
Authors	associated factor	AOR	LCI	UCI	Log_LcI	LogU_CI	Log_AOR	Stan_error
MULINDWA YJ et al.,2025	Vaginal delivery	4.5	3.2	7.8	1.16315	2.05412	1.50408	0.227289
Nkoka O et al.,2019	Vaginal delivery	3.15	2.4	4.13	0.875469	1.41828	1.1474	0.138472
Muchiri IM et al.,2022	Vaginal delivery	7.14	2.33	21.9	0.845868	3.08649	1.96571	0.571586
Gebremeskel SG et al.,2019	Vaginal delivery	4.59	1.99	10.56	0.688135	2.35707	1.52388	0.42575
Zewdu F et al.,2025	Vaginal delivery	5.63	3.64	8.71	1.29198	2.16447	1.72811	0.222573
Shirima LJ et al.,2022	Residence	2.73	1.06	6.89	0.0582689	1.93007	1.0043	0.477501
Exavery A et al.,2015	Residence	1.92	1.12	3.23	0.113329	1.17248	0.652325	0.270192
Nkoka O et al.,2019	Residence	1.98	1.5	2.6	0.405465	0.955511	0.683097	0.140318
Boakye-Yiadom APet al.,2021	Residence	1.92	1.14	3.22	0.131028	1.16938	0.652325	0.264886
Armdie AZ et al.,2024	Residence	3.29	1.86	5.84	0.620576	1.76473	1.19089	0.291876
Liben ML et al.,2016	Residence	3.8	2.32	6.06	0.841567	1.80171	1.335	0.244934
Setegn T et al.,2011	Residence	4.1	2.31	7.3	0.837248	1.98787	1.41099	0.293527
MULINDWA YJ et al.,2025	≥4 ANC visit	2.3	1.4	3.8	0.336472	1.335	0.832909	0.254727
Boakye-Yiadom AP et al.,2021	≥4 ANC visit	1.14	1.04	1.25	0.0392207	0.223144	0.131028	0.0469191
Getnet B et al., 2020	≥4 ANC visit	2.2	1.24	3.94	0.215111	1.37118	0.788457	0.294916
Wolde T et al., 2014	≥4 ANC visit	10.6	2.86	33.33	1.05082	3.50646	2.36085	0.626438
Ayalew DD et l.,2022	≥4 ANC visit	1.85	1.03	3.85	0.0295588	1.34807	0.615186	0.336356
Boksh Z et al.,2018	≥4 ANC visit	1.43	1.14	1.81	0.131028	0.593327	0.357674	0.117933
MULINDWA YJ et al.,2025	Maternal age ≥25 years old	1.28	1.01	1.6	0.00995033	0.470004	0.24686	0.117361
Boakye-Yiadom APet al.,2021	Maternal age ≥25 years old	1.04	1.01	1.07	0.00995033	0.0676586	0.0392207	0.0147215
Ayalew DD et l.,2022	Maternal age ≥25 years old	2.76	1.21	6.27	0.19062	1.83578	1.01523	0.419683
MULINDWA YJ et al.,2025	Maternal knowledge	3.2	1.9	5.4	0.641854	1.6864	1.16315	0.266466
Lyellu HY et al.,2020	Maternal knowledge	3.01	1.56	5.81	0.444686	1.75958	1.10194	0.335432
Exavery A et al.,2015	Maternal knowledge	1.73	1.23	2.42	0.207014	0.883768	0.548121	0.172641
Ali F et al.,2020	Maternal primary education and above	1.09	1.003	1.18	0.00299551	0.165514	0.0861777	0.0414589
Gebremeskel SG et al.,2019	Maternal primary education and above	1.99	1.36	2.92	0.307485	1.07158	0.688135	0.194923
Liben ML et al.,2016	Maternal primary education and above	2	1.21	3.46	0.19062	1.24127	0.693147	0.268023
Cyprien KK et al.,2025	Maternal primary education and above	2.2	1.37	3.93	0.314811	1.36864	0.788457	0.268834
MULINDWA YJ et al.,2025	Being multiparous	2.6	1.5	4.3	0.405465	1.45862	0.955511	0.268661
Ali F et al.,2020	Being multiparous	1.12	1.02	1.21	0.0198026	0.19062	0.113329	0.043576
Nkoka O et al.,2019	Being multiparous	1.96	1.19	3.24	0.173953	1.17557	0.672944	0.255515
Armdie AZ et al.,2024	Being multiparous	1.42	1.08	1.86	0.076961	0.620576	0.350657	0.138677
Liben ML et al.,2016	Being multiparous	1.69	1.01	2.86	0.00995033	1.05082	0.524729	0.265528
Ayalew G et al.,2024	Being multiparous	2.25	1.32	3.84	0.277632	1.34547	0.81093	0.272408
Armdie AZ et al.,2024	Skilled birth delivery	2.13	1.01	4.48	0.00995033	1.49962	0.756122	0.380019
Ayalew G et al.,2024	Skilled birth delivery	1.95	1.01	3.77	0.00995033	1.32708	0.667829	0.336001
Gebretsadik GG et al.,2020	Skilled birth delivery	4.75	1.71	13.19	0.536493	2.57946	1.55814	0.521165
Boksh Z et al.,2018	Skilled birth delivery	1.47	1.2	1.79	0.182322	0.582216	0.385262	0.102014
MULINDWA YJ et al.,2025	Immediate skin to skin contact	6.1	3.2	10.4	1.16315	2.34181	1.80829	0.300677
Shirima LJ et al.,2022	Immediate skin to skin contact	2.4	1.53	3.83	0.425268	1.34286	0.875469	0.234081
Ali F et al.,2020	Immediate skin to skin contact	1.38	1.29	1.47	0.254642	0.385262	0.322083	0.0333215
Armdie AZ et al.,2024	Immediate skin to skin contact	1.59	1.12	2.24	0.113329	0.806476	0.463734	0.176823
Liben ML et al.,2015	Colostrum feeding	2.1	1.23	3.53	0.207014	1.2613	0.741937	0.26895
Wolde T et al., 2014	Colostrum feeding	5.26	1.5	20	0.405465	2.99573	1.66013	0.660782
Zewdu F et al.,2025	Colostrum feeding	2.89	1.85	4.52	0.615186	1.50851	1.06126	0.227889
MULINDWA YJ et al.,2025	Good neonatal condition	2.5	1.3	4.6	0.262364	1.52606	0.916291	0.32237
Armdie AZ et al.,2024	Good neonatal condition	3.31	1.95	5.62	0.667829	1.72633	1.19695	0.270026
Setegn T et al.,2011	Postnatal counseling	2.7	1.86	3.94	0.620576	1.37118	0.993252	0.191481
Boksh Z et al.,2018	Postnatal counseling	1.39	1.15	1.67	0.139762	0.512824	0.329304	0.0951688
Armdie AZ et al.,2024	No postpartum complication	1.68	1.02	2.76	0.0198026	1.01523	0.518794	0.253936
Ayalew G et al.,2024	No postpartum complication	4.44	2.34	8.42	0.850151	2.13061	1.49065	0.326648
MULINDWA YJ et al.,2025	Receiving support from healthcare providers	3.1	1.7	5.6	0.530628	1.72277	1.1314	0.304117
Ayalew G et al.,2024	Receiving support from healthcare providers	1.95	1.01	3.77	0.00995033	1.32708	0.667829	0.336001
